# Supplementary material
Source: publisher figshare collection journal article supplement (https://diabetesjournals.figshare.com/ndownloader/files/26218412)

## **Online-Only Supplemental Material**

### **Longitudinal Patterns of Resting Heart Rate and its Associations with Cardiovascular Outcomes in the DCCT/EDIC Study**

This document presents supplemental materials cited in the text of the main manuscript.

**Supplemental Table S1.** Prolonged beneficial effect of prior intensive therapy (metabolic memory) on heart rate

**Supplemental Figure S1:** Heatscatter plot of heart rate vs. pulse rate measurements during EDIC

**Supplemental Table S1. Prolonged beneficial effect of prior intensive therapy (metabolic memory) on heart rate**

|                      | <b>Intensive<br/>(N=698)</b>        | <b>Conventional<br/>(N=704)</b> | <b>Intensive vs. Conventional<br/>Comparison</b> |                             |                               |
|----------------------|-------------------------------------|---------------------------------|--------------------------------------------------|-----------------------------|-------------------------------|
|                      | <b>LS means <math>\pm</math> SE</b> |                                 | <b>Adjusted<br/><math>\beta \pm</math> SE</b>    | <b>Adjusted<br/>p-value</b> | <b>Unadjusted<br/>p-value</b> |
| <b>EDIC<br/>Year</b> |                                     |                                 |                                                  |                             |                               |
| 1                    | 68.07 $\pm$ 0.73                    | 70.01 $\pm$ 0.74                | -1.95 $\pm$ 0.52                                 | 0.0002                      | <0.0001                       |
| 2                    | 67.63 $\pm$ 0.77                    | 69.36 $\pm$ 0.78                | -1.73 $\pm$ 0.53                                 | 0.0012                      | <0.0001                       |
| 3                    | 69.36 $\pm$ 0.79                    | 71.33 $\pm$ 0.79                | -1.97 $\pm$ 0.56                                 | 0.0004                      | <0.0001                       |
| 4                    | 70.07 $\pm$ 0.80                    | 71.92 $\pm$ 0.79                | -1.84 $\pm$ 0.56                                 | 0.0010                      | <0.0001                       |
| 5                    | 70.72 $\pm$ 0.80                    | 71.83 $\pm$ 0.80                | -1.11 $\pm$ 0.56                                 | 0.0466                      | 0.0022                        |
| 6                    | 70.94 $\pm$ 0.81                    | 71.90 $\pm$ 0.81                | -0.96 $\pm$ 0.55                                 | 0.0841                      | 0.0044                        |
| 7                    | 72.88 $\pm$ 0.86                    | 73.23 $\pm$ 0.85                | -0.35 $\pm$ 0.57                                 | 0.5388                      | 0.0475                        |
| 8                    | 71.80 $\pm$ 0.83                    | 72.93 $\pm$ 0.83                | -1.13 $\pm$ 0.58                                 | 0.0497                      | 0.0018                        |
| 9                    | 70.99 $\pm$ 0.82                    | 71.98 $\pm$ 0.82                | -1.00 $\pm$ 0.56                                 | 0.0740                      | 0.0018                        |
| 10                   | 70.94 $\pm$ 0.83                    | 70.91 $\pm$ 0.82                | 0.03 $\pm$ 0.56                                  | 0.9632                      | 0.1576                        |
| 11                   | 70.61 $\pm$ 0.86                    | 70.12 $\pm$ 0.87                | 0.49 $\pm$ 0.60                                  | 0.4119                      | 0.4584                        |
| 12                   | 69.49 $\pm$ 0.84                    | 69.65 $\pm$ 0.84                | -0.15 $\pm$ 0.58                                 | 0.7933                      | 0.0975                        |
| 13                   | 69.46 $\pm$ 0.79                    | 69.84 $\pm$ 0.80                | -0.38 $\pm$ 0.57                                 | 0.5057                      | 0.0300                        |
| 14                   | 70.72 $\pm$ 0.85                    | 70.35 $\pm$ 0.85                | 0.37 $\pm$ 0.57                                  | 0.5213                      | 0.4933                        |
| 15                   | 69.66 $\pm$ 0.88                    | 69.68 $\pm$ 0.89                | -0.02 $\pm$ 0.61                                 | 0.9734                      | 0.1824                        |
| 16                   | 68.91 $\pm$ 0.81                    | 69.21 $\pm$ 0.82                | -0.30 $\pm$ 0.57                                 | 0.6044                      | 0.0842                        |
| 17                   | 67.70 $\pm$ 0.84                    | 68.02 $\pm$ 0.85                | -0.31 $\pm$ 0.59                                 | 0.5953                      | 0.1198                        |
| 18                   | 68.15 $\pm$ 0.84                    | 68.47 $\pm$ 0.86                | -0.32 $\pm$ 0.59                                 | 0.5853                      | 0.0528                        |
| 19                   | 68.42 $\pm$ 0.85                    | 69.27 $\pm$ 0.85                | -0.85 $\pm$ 0.59                                 | 0.1487                      | 0.0041                        |
| 20                   | 69.28 $\pm$ 0.82                    | 68.67 $\pm$ 0.83                | 0.60 $\pm$ 0.58                                  | 0.3015                      | 0.3928                        |

Data are least square means  $\pm$  standard errors, beta estimates  $\pm$  standard errors, and p-values from separate generalized linear models evaluating treatment group differences in mean heart rate (derived from ECGs) separately at each EDIC year. Each model is adjusted for the DCCT closeout heart rate value as well as primary prevention vs. secondary intervention cohort, sex, race, and DCCT closeout age and duration of diabetes.

**Supplemental Figure S1: Heatscatter plot of heart rate vs. pulse rate measurements during EDIC**

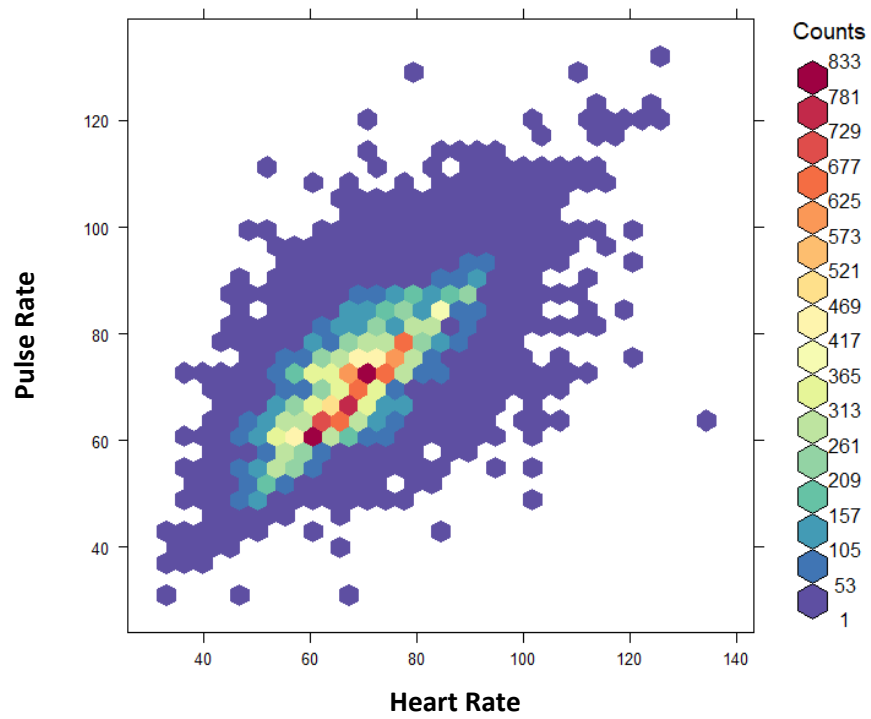

Supplement: Supplementary file 1 [file 26218412]
